# Supplementary material for: Event-based probabilistic risk assessment of livestock snow disasters in the Qinghai–Tibetan Plateau
Source: Copernicus journal article supplement (doi:10.5194/nhess-19-697-2019), 2019-04-02
Supplement: Supplementary file 1 [file nhess-19-697-2019-supplement.pdf]

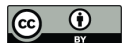

*Supplement of*

## **Event-based probabilistic risk assessment of livestock snow disasters in the Qinghai–Tibetan Plateau**

**Tao Ye et al.**

*Correspondence to:* Yijia Li ([liyijia@mail.bnu.edu.cn](mailto:liyijia@mail.bnu.edu.cn))

The copyright of individual parts of the supplement might differ from the CC BY 4.0 License.

## Supplementary Figures and Tables

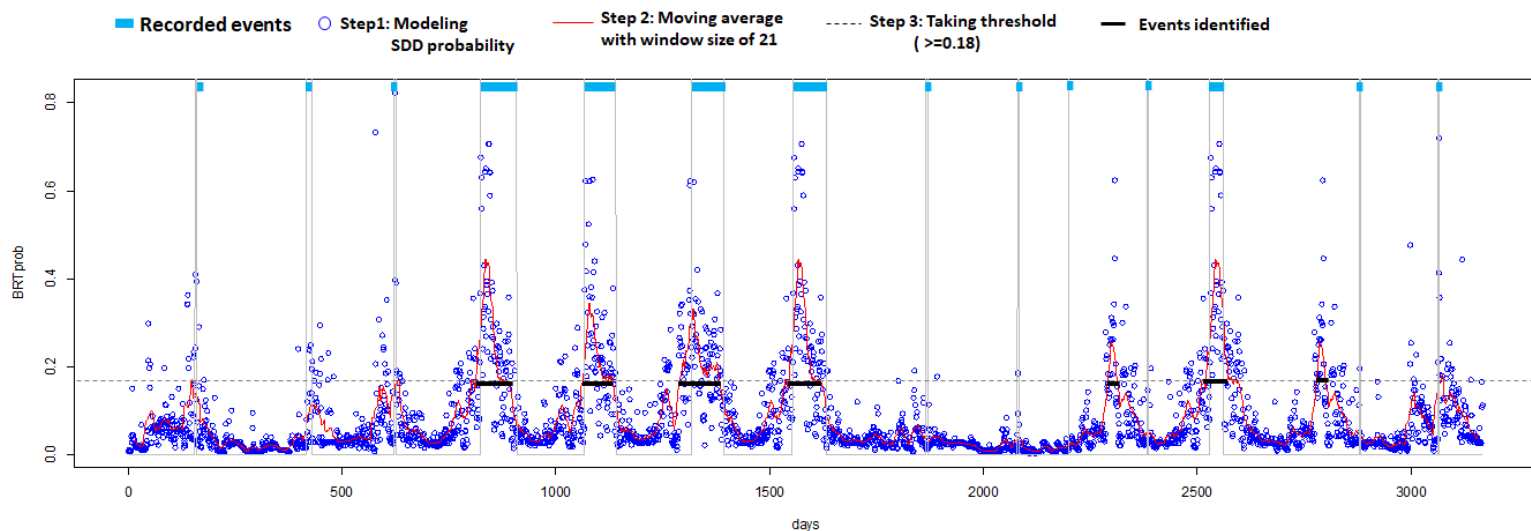

**Fig. S1 Illustrative chart of the procedure for identifying snow disaster events, and its calibration with historical records.** The time series is the conjunction of days in the winter season (October 1 to May 31) with snow disaster records after 2008. In total, this includes 13 station•winter and 3168 single days. The figure shows that the procedure is capability of accurately capturing major historical events with relatively longer duration in terms of both timing of occurrence and duration.

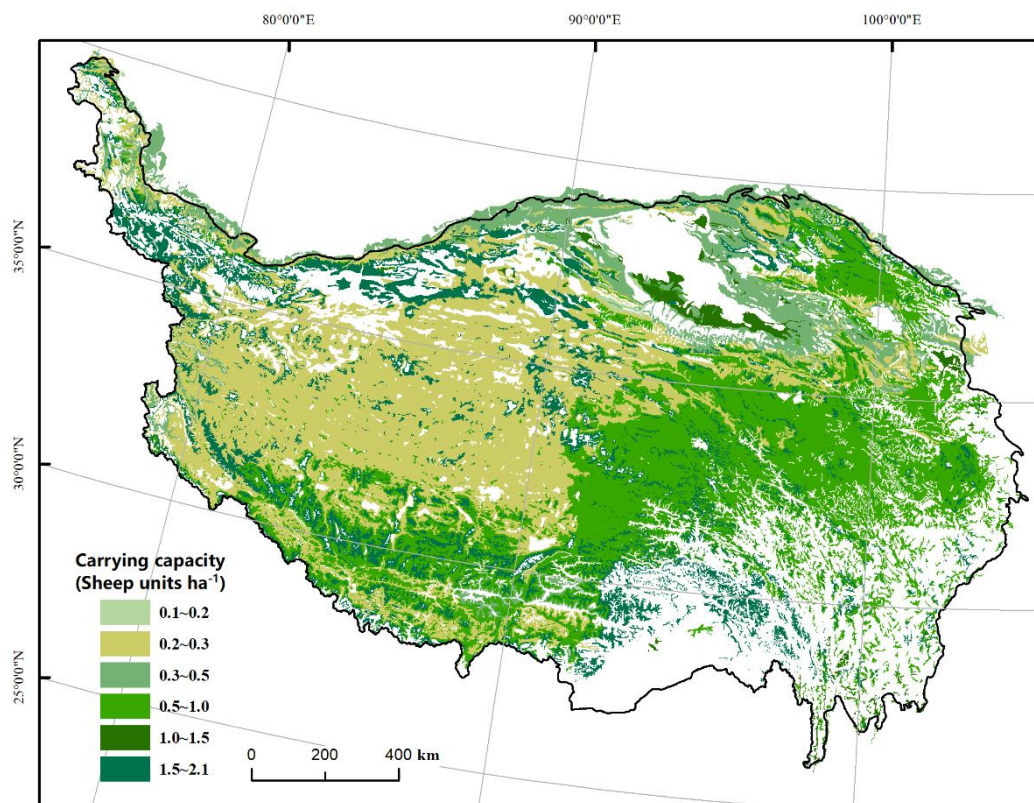

**Fig. S2 Spatial distribution of livestock exposure estimated from vegetation distribution**

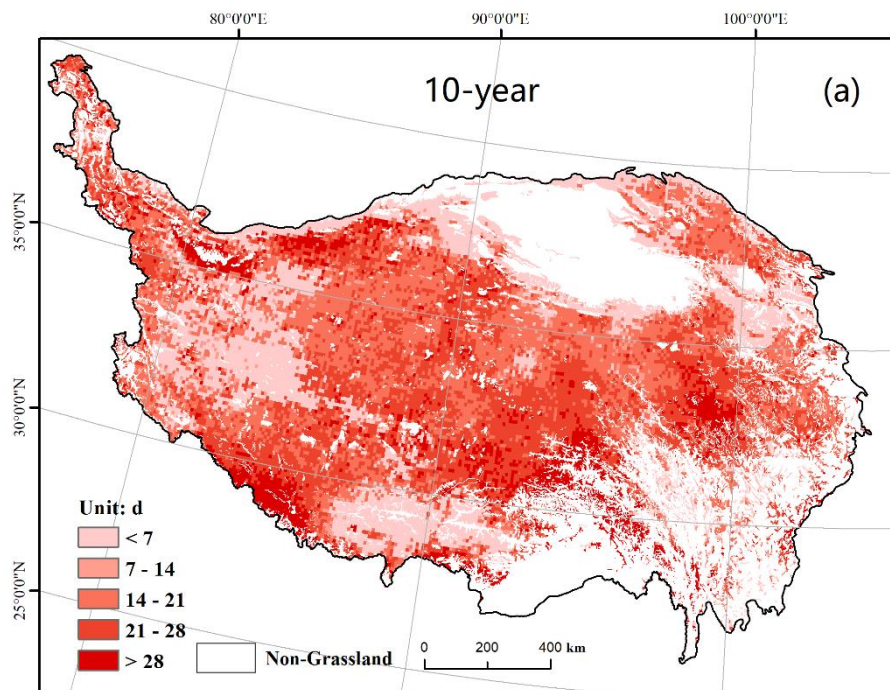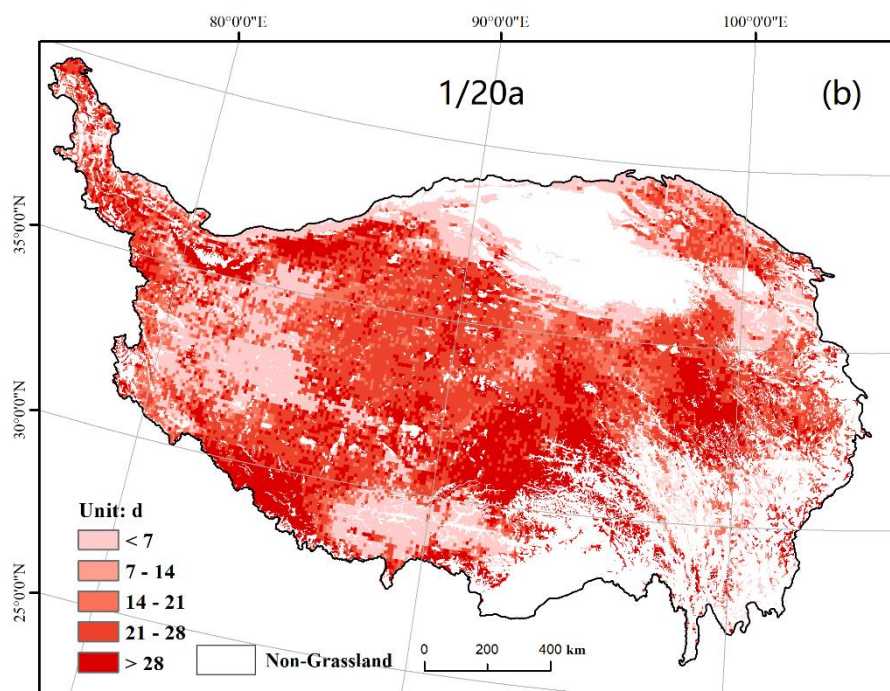

Fig. S3 Gridded duration of a single disaster event by return period: (a)10-year; (b) 20-year

**Table S1 Look-up table of carrying capacity by grassland type in the QTP**

| Grassland type          | Fresh grass yield (kg/ha) | Annual grazing rate (%) | Grassland required per sheep unit (ha/unit) | Carrying capacity (sheep unit/ha) |
|-------------------------|---------------------------|-------------------------|---------------------------------------------|-----------------------------------|
| Alpine meadow           | 1452                      | 50                      | 305.70                                      | 0.74                              |
| Alpine steppe           | 677                       | 40                      | 819.30                                      | 0.27                              |
| Apline meadow-steppe    | 689                       | 45                      | 745.20                                      | 0.30                              |
| Alpine desert-steppe    | 554                       | 35                      | 1077.30                                     | 0.21                              |
| Apline desert           | 519                       | 30                      | 988.95                                      | 0.23                              |
| Temperate steppe        | 3018                      | 40                      | 170.10                                      | 1.32                              |
| Temperate desert        | 683                       | 30                      | 1183.50                                     | 0.19                              |
| Temperate desert-steppe | 611                       | 35                      | 840.75                                      | 0.27                              |
| Lowland meadow          | 3498                      | 50                      | 127.50                                      | 1.76                              |
| Mountain meadow         | 3879                      | 55                      | 132.30                                      | 1.70                              |

Note: Figures were adapted from (Xin et al., 2011) and (Land Management Administration of Tibet Autonomous Region, 1994)

**Supplementary material S1: Model details of the vulnerability function associated to Eq. (1)**

Vulnerability function Eq. (1) describes the quantitative relationship between the natural logarithm of livestock mortality rate ( $\ln LR$ ) and disaster duration (*Duration*), during disaster maximum daily mean wind speed (*Wind*), growing season (May-Sep) aggregate precipitation (*P*), and prevention capacity as measured by fiscal expenditure of the local county government (*Fiscal\_Exp*) of the underlying county:

$$\ln LR = s(\textit{Duration}) + s(\textit{Wind}) + s(\textit{P}) + s(\textit{Fiscal\_Exp})$$

The quantitative relationship was derived using generalized additive model, based on the data of 74 historical snow disaster event in the Qinghai-Tibet Plateau during 2008-2015 (Li et al. 2018).

Model fit statistics (Figure S1) indicate that all four variables are statistically significant. Adjusted- $R^2$  is 0.563 and the overall deviance explained is 62.5%. Ten-fold cross-validation indicates that RMSE, MAE and ME for the model are 1.747, 1.325, and -0.002, respectively.

```
Family: gaussian
Link function: identity

Formula:
lnLR ~ s(Duration) + s(Value_Add, k = 4) + s(maxWind) + s(P)

Parametric coefficients:
              Estimate Std. Error t value Pr(>|t|)
(Intercept)  0.5300    0.1708    3.103  0.00287 **
---
Signif. codes:  0 '***' 0.001 '**' 0.01 '*' 0.05 '.' 0.1 ' ' 1

Approximate significance of smooth terms:
              edf Ref.df    F  p-value
s(Duration)  5.626  6.705  9.706 1.96e-08 ***
s(Value_Add) 1.000  1.000  8.878  0.00407 **
s(maxWind)   2.732  3.440  2.747  0.04463 *
s(P)         1.000  1.000  2.809  0.09864 .
---
Signif. codes:  0 '***' 0.001 '**' 0.01 '*' 0.05 '.' 0.1 ' ' 1

R-sq.(adj) =  0.563  Deviance explained = 62.5%
GCV = 2.5508  Scale est. = 2.1593    n = 74
```

**Figure S1: Model-fit statistics**

Its response curves are provided in Figure S2. These curves indicate that: (1)  $\ln LR$  is increasing with snow disaster duration. Duration up to 15-18 d is a critical period that mortality will increase rapidly. (2)  $\ln LR$  decreases with value added of animal husbandry (*Value\_Add*), indicating the effect of stronger prevention capacity in reducing mortality, i.e. government expenditure in reserving hay for preparedness, and subsidy to herders to build/enlarge warm sheds. (3) An inverted-U shaped relationship between daily maximum wind speed and  $\ln LR$ . The up-slope part indicates the increasing stress of stronger wind on livestock, but the down-slope part (beyond 5-6 m/s) indicate herder's reaction to stop free-grazing and keep herds in shelters (Wu et al. 2007). (4)  $\ln LR$  decreases with growing season precipitation. Larger growing season precipitation indicates more abundant food for livestock in summer, and therefore better body-condition in resisting low temperature and lack of food in snow disaster times.

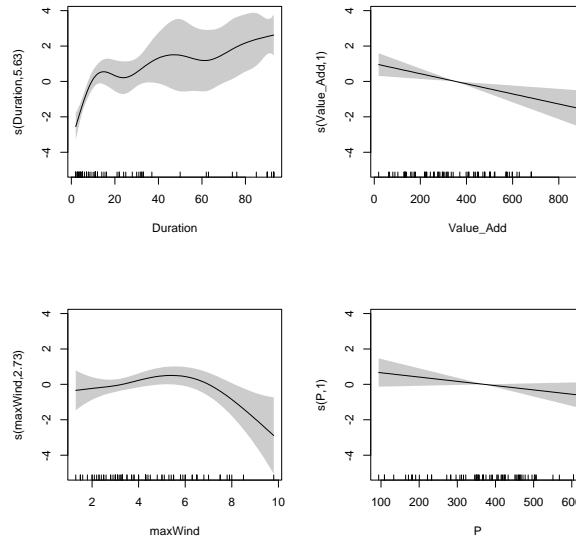

**Figure S2: Response curves of the GAM model associated to Eq. (1)**

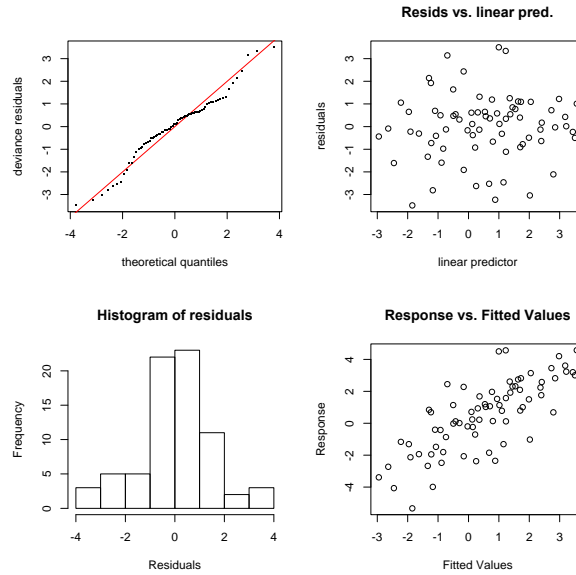

**Figure S3: Performance diagnostics charts for the GAM model associated to Eq. (1)**

- 5 The performance diagnostics charts of the model (Figure S3) indicate that 1) QQ plot is very close to a straight line, suggesting our distributional assumption of normality is reasonable. 2) the variance is approximately constant as the mean increases. 3) The histogram of residuals appears approximately consistent with normality. 4) the response against fitted values show a positive linear relationship in the scatter plot.

For more details of data, variable used, model fitting and variable selection, please refer to Li et al. (2018) and Ye et al. (2018; under review).
